# Supplementary material
Source: Springer Nature journal article supplement (https://www.springermedizin.de/resource/supplementary/13058_2004_1018_MOESM3_ESM.pdf/9698150)

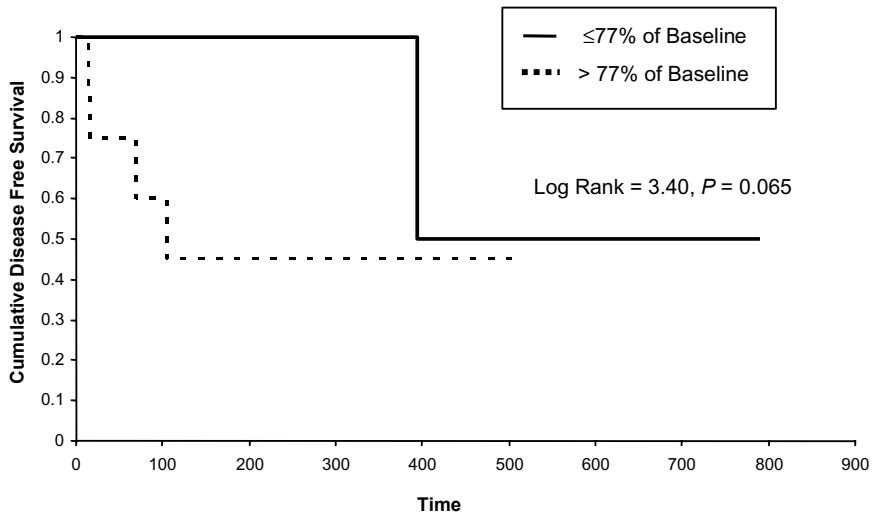

Supplement: MOESM3 [file 9698150]
